# Supplementary material for: Full-genome sequencing and mutation analysis of SARS-CoV-2 isolated from Makassar, South Sulawesi, Indonesia
Source: PeerJ. 2022 Jun 10;10:e13522. doi: 10.7717/peerj.13522 (PMC9190667; doi:10.7717/peerj.13522)
Supplement: Supplemental Information 2 — The positions referred to the reference sequence NC_045512.2. The frequencies of each mutation are depicted in the lowest rows. [file peerj-10-13522-s002.xlsx]

## Sheet: Table
		1	2	3	4	5	6	7	8	9	10	11	12	13	14	15	16	17	18	19	20	21	22	23	24	25	26	27	28	29	30	31	32	33	34	35	36	37	38	39	40	41	42	43	44	45	46	47	48
		NSP1-ORF1AB		NSP2-ORF1AB					NSP3-ORF1AB																								NSP5A-ORF1AB	NSP6-ORF1AB											NSP8-ORF1AB	NSP12-ORF1AB
VIRUS ID	ACCESSION ID	33	110	46	129	168	208	400	2	122	126	195	342	346	350	369	424	595	740	822	822	833	970	1041	1189	1214	1228	1307	1311	1424	1504	1682	33	29	30	31	33	34	35	35	37	75	149	193	95	91	161	323	879
hCoV-19/Wuhan/Hu-1/2019	NC_045512.2	D	H	R	P	N	H	L	P	E	S	E	H	V	T	V	T	E	T	P	P	N	T	Y	T	D	P	H	A	S	G	S	D	T	Q	W	L	F	ins	T	L	L	V	C	L	K	D	P	D
hCoV-19/Indonesia/SN-MKS_01/2021	EPI_ISL_1247019	D	H	K	P	N	H	L	P	E	L	E	H	V	I	V	T	E	T	L	P	N	T	Y	T	D	P	H	A	S	G	S	D	P	E	Y	M	V	VL	T	F	F	V	C	L	K	D	L	D
hCoV-19/Indonesia/SN-MKS_02/2021	EPI_ISL_1247873	D	H	R	P	N	H	L	P	E	L	E	H	V	I	V	T	E	T	L	P	N	M	Y	T	D	P	H	A	S	G	S	D	T	Q	W	L	F	ins	T	L	F	V	C	L	K	D	L	D
hCoV-19/Indonesia/SN-MKS_03/2021	EPI_ISL_1248934	D	H	R	P	N	H	L	P	E	S	E	H	V	I	V	T	E	T	P	F	N	T	Y	T	D	P	H	A	S	G	S	D	T	Q	W	L	F	ins	T	L	L	V	C	L	K	D	L	D
hCoV-19/Indonesia/SN-MKS_04/2021	EPI_ISL_1249610	D	H	R	P	N	H	L	P	E	S	G	H	V	I	V	T	E	T	L	P	N	T	Y	T	D	P	H	A	S	C	F	D	T	Q	W	L	F	ins	T	L	L	V	C	L	K	D	L	D
hCoV-19/Indonesia/SN-MKS_05/2021	EPI_ISL_1250222	D	H	R	P	N	H	L	P	E	L	E	H	V	I	V	T	E	T	L	P	N	T	Y	T	D	P	H	A	S	G	S	D	T	Q	W	L	F	ins	T	L	F	V	C	L	K	D	L	D
hCoV-19/Indonesia/SN-MKS_06/2021	EPI_ISL_1258423	D	H	R	P	N	H	L	P	E	S	E	H	V	I	V	T	E	A	L	P	T	T	Y	T	D	P	H	A	S	G	S	D	T	Q	W	L	F	ins	T	L	L	V	C	L	K	D	L	D
hCoV-19/Indonesia/SN-MKS_07/2021	EPI_ISL_1258424	D	H	R	P	N	H	L	P	E	L	E	H	V	I	V	T	E	T	L	P	N	T	Y	T	D	P	H	A	S	G	S	D	T	Q	W	L	F	ins	T	L	F	F	C	L	K	D	L	D
hCoV-19/Indonesia/SN-MKS_08/2021	EPI_ISL_1258463	D	H	R	P	N	H	L	P	E	L	E	H	V	I	V	T	E	T	L	P	N	T	H	T	G	L	H	A	S	G	S	D	T	Q	W	L	F	ins	T	L	F	V	C	L	K	D	L	D
hCoV-19/Indonesia/SN-MKS_09/2021	EPI_ISL_1258464	D	H	R	P	N	H	L	P	E	L	E	H	V	I	V	T	E	T	L	P	N	T	Y	T	D	P	H	A	S	G	S	D	T	Q	W	L	F	ins	T	L	F	V	C	F	K	D	L	D
hCoV-19/Indonesia/SN-MKS_10/2021	EPI_ISL_1258465	D	H	R	P	N	H	L	P	E	L	E	H	V	I	V	T	E	T	L	P	N	T	Y	T	D	P	H	A	S	G	S	D	T	Q	W	L	F	ins	T	L	F	V	C	L	K	D	L	D
hCoV-19/Indonesia/SN-MKS_11/2021	EPI_ISL_1263319	D	H	R	P	N	H	L	P	E	L	E	H	V	I	V	T	E	T	L	P	N	T	Y	T	D	P	H	A	S	G	S	D	T	Q	W	L	F	ins	T	L	F	V	C	L	K	D	L	D
hCoV-19/Indonesia/SN-MKS_12/2021	EPI_ISL_1263320	D	H	R	P	N	H	L	P	E	L	E	H	V	I	V	T	E	T	L	P	N	T	Y	T	D	P	H	A	S	G	S	D	T	Q	W	L	F	ins	T	L	F	V	C	L	K	D	L	D
hCoV-19/Indonesia/SN-MKS_13/2021	EPI_ISL_1263321	D	H	R	P	N	H	L	P	E	L	E	H	V	I	I	T	E	T	L	P	N	T	Y	T	D	P	H	A	S	G	S	D	T	Q	W	L	F	ins	T	L	F	V	C	L	K	D	L	D
hCoV-19/Indonesia/SN-MKS_14/2021	EPI_ISL_1263322	D	H	R	S	N	H	L	L	E	L	E	H	V	I	V	T	E	T	L	P	N	T	Y	T	D	P	H	A	S	G	S	D	T	Q	W	L	F	ins	T	L	F	V	C	L	K	D	L	D
hCoV-19/Indonesia/SN-MKS_15/2021	EPI_ISL_1263323	D	H	R	P	N	H	L	P	E	S	E	H	V	I	V	T	E	T	L	P	N	T	Y	T	D	P	H	A	S	G	S	D	T	Q	W	L	F	ins	T	L	L	V	C	L	K	D	L	D
hCoV-19/Indonesia/SN-MKS_16/2021	EPI_ISL_1630277	D	H	R	P	N	H	L	P	E	L	E	H	V	I	V	T	E	T	L	P	N	T	Y	T	D	P	H	A	S	G	S	D	T	Q	W	L	F	ins	T	L	F	V	C	L	K	D	L	D
hCoV-19/Indonesia/SN-MKS_17/2021	EPI_ISL_1630278	D	H	R	P	N	H	F	P	V	S	E	H	V	I	V	T	E	T	L	P	N	T	Y	I	D	P	H	V	S	G	S	D	T	Q	W	L	F	ins	T	L	L	V	C	L	K	N	L	D
hCoV-19/Indonesia/SN-MKS_18/2021	EPI_ISL_1630279	D	H	R	P	N	H	L	P	E	L	E	H	V	I	V	I	E	T	L	P	N	T	Y	T	D	P	H	A	S	G	S	D	T	Q	W	L	F	ins	T	L	F	V	C	L	K	D	L	D
hCoV-19/Indonesia/SN-MKS_19/2021	EPI_ISL_1630280	D	H	R	P	N	H	L	P	E	L	E	H	V	I	V	T	E	T	L	P	N	T	Y	T	D	P	H	A	S	G	S	D	T	Q	W	L	F	ins	T	L	F	V	C	L	K	D	L	D
hCoV-19/Indonesia/SN-MKS_20/2021	EPI_ISL_1630281	D	H	R	P	N	Y	L	P	E	S	E	H	V	I	V	T	E	T	L	P	N	T	Y	T	D	P	H	A	S	G	S	D	T	Q	W	L	F	ins	T	L	L	V	C	L	K	D	L	D
hCoV-19/Indonesia/SN-MKS_21/2021	EPI_ISL_2691912	D	H	R	P	N	H	L	P	E	S	E	H	V	I	V	T	E	T	L	P	N	T	Y	T	D	P	H	A	S	G	S	D	T	Q	W	L	F	ins	I	L	L	V	C	L	K	D	L	D
hCoV-19/Indonesia/SN-MKS_22/2021	EPI_ISL_2692137	D	H	R	P	N	H	L	P	E	L	E	H	V	I	V	T	E	T	L	P	N	T	Y	T	D	P	H	A	S	G	S	D	T	Q	W	L	F	ins	T	L	F	V	C	L	K	D	L	Y
hCoV-19/Indonesia/SN-MKS_23/2021	EPI_ISL_2692142	D	H	R	P	N	H	L	P	E	L	E	H	V	I	V	T	E	T	L	P	N	T	Y	T	D	P	H	A	S	G	S	D	T	Q	W	L	F	ins	T	L	F	V	C	L	K	D	L	D
hCoV-19/Indonesia/SN-MKS_24/2021	EPI_ISL_2692143	D	H	R	P	N	H	L	P	E	S	E	H	V	I	V	T	E	T	L	P	N	T	Y	T	D	P	H	A	S	G	S	D	T	Q	W	L	F	ins	T	L	L	V	C	L	K	D	L	D
hCoV-19/Indonesia/SN-MKS_25/2021	EPI_ISL_2692144	D	H	R	P	N	H	L	P	E	S	E	H	V	I	V	T	E	T	L	P	N	T	Y	T	D	P	H	A	S	G	S	D	T	Q	W	L	F	ins	T	L	L	V	C	L	K	D	L	D
hCoV-19/Indonesia/SN-MKS_26/2021	EPI_ISL_2692169	D	H	R	P	N	H	L	P	E	L	E	H	V	I	V	T	E	T	L	P	N	T	Y	T	D	P	H	A	S	G	S	D	T	Q	W	L	F	ins	T	L	F	V	C	L	K	D	L	D
hCoV-19/Indonesia/SN-MKS_27/2021	EPI_ISL_2692170	D	H	R	P	N	H	L	P	E	S	E	H	V	I	V	T	E	T	L	P	N	T	Y	T	D	P	H	A	S	G	S	D	T	Q	W	L	F	ins	T	L	L	V	C	L	K	D	L	D
hCoV-19/Indonesia/SN-MKS_28/2021	EPI_ISL_2692171	D	H	R	P	N	H	L	P	E	L	E	H	V	I	V	T	E	T	L	P	N	T	Y	T	D	P	H	A	S	G	S	D	T	Q	W	L	F	ins	T	L	F	F	C	L	R	D	L	D
hCoV-19/Indonesia/SN-MKS_29/2021	EPI_ISL_2692179	D	Y	R	P	N	H	L	P	E	L	E	H	V	I	V	T	D	T	L	P	N	T	Y	T	D	P	H	A	S	G	S	D	T	Q	W	L	F	ins	T	L	F	V	C	L	K	D	L	D
hCoV-19/Indonesia/SN-MKS_30/2021	EPI_ISL_2692205	D	H	R	P	N	H	L	P	E	L	E	H	V	I	V	T	E	T	L	P	N	T	Y	T	D	P	H	A	S	G	S	D	T	Q	W	L	F	ins	T	L	F	F	C	L	K	D	L	D
hCoV-19/Indonesia/SN-MKS_31/2021	EPI_ISL_2692206	D	H	R	P	N	H	L	P	E	L	E	Y	V	I	V	T	E	T	L	P	N	T	Y	T	D	P	H	A	S	G	S	D	T	Q	W	L	F	ins	T	L	F	V	C	L	K	D	L	D
hCoV-19/Indonesia/SN-MKS_32/2021	EPI_ISL_2692531	D	H	R	P	N	H	L	P	E	L	E	H	V	I	V	T	E	T	L	P	N	T	Y	T	D	P	H	A	S	G	S	D	T	Q	W	L	F	ins	T	L	F	V	C	L	K	D	L	D
hCoV-19/Indonesia/SN-MKS_33/2021	EPI_ISL_2692533	D	H	R	P	N	H	L	P	E	L	E	H	V	I	V	T	E	T	L	P	N	T	Y	T	D	P	H	A	S	G	S	D	T	Q	W	L	F	ins	T	L	F	V	C	L	K	D	L	D
hCoV-19/Indonesia/SN-MKS_34/2021	EPI_ISL_2692706	D	H	R	P	N	H	L	P	E	L	E	H	V	I	V	T	E	T	L	P	N	T	Y	T	D	P	H	A	S	G	S	D	T	Q	W	L	F	ins	T	L	F	V	C	L	K	D	L	D
hCoV-19/Indonesia/SN-MKS_35/2021	EPI_ISL_2692880	D	H	R	P	N	H	L	P	E	L	E	H	V	I	V	T	E	T	L	P	N	T	Y	T	D	P	H	A	S	G	S	D	T	Q	W	L	F	ins	T	L	F	F	C	L	K	D	L	D
hCoV-19/Indonesia/SN-MKS_36/2021	EPI_ISL_2692882	D	H	R	P	N	H	F	P	V	S	E	H	V	I	V	T	E	T	L	P	N	T	Y	I	D	P	H	V	S	G	S	D	T	Q	W	L	F	ins	T	L	L	V	C	L	K	N	L	D
hCoV-19/Indonesia/SN-MKS_37/2021	EPI_ISL_2692883	D	H	R	P	N	H	L	P	E	L	E	H	V	I	V	T	E	T	L	P	N	T	Y	T	D	P	H	A	S	G	S	D	T	Q	W	L	F	ins	T	L	F	V	C	L	K	D	L	D
hCoV-19/Indonesia/SN-MKS_38/2021	EPI_ISL_2692884	D	H	R	P	N	H	L	P	E	L	E	H	V	I	V	T	E	T	L	P	N	T	Y	T	D	P	H	A	S	G	S	D	T	Q	W	L	F	ins	T	L	F	V	C	L	K	D	L	D
hCoV-19/Indonesia/SN-MKS_39/2021	EPI_ISL_2692886	D	H	R	P	N	H	L	P	E	L	E	H	V	I	V	T	E	T	L	P	N	T	Y	T	D	P	H	A	S	G	S	D	T	Q	W	L	F	ins	T	L	F	V	C	L	K	D	L	D
hCoV-19/Indonesia/SN-MKS_40/2021	EPI_ISL_2692887	D	H	R	P	N	H	L	L	E	L	E	H	V	I	V	T	E	T	L	P	N	T	Y	T	D	P	H	A	S	G	S	D	T	Q	W	L	F	ins	T	L	F	V	C	L	K	D	L	D
hCoV-19/Indonesia/SN-MKS_41/2021	EPI_ISL_2692889	N	H	R	P	N	H	L	P	E	L	E	H	V	I	V	T	E	T	L	P	N	T	Y	T	D	P	H	A	S	G	S	D	T	Q	W	L	F	ins	T	L	F	V	C	L	K	D	L	D
hCoV-19/Indonesia/SN-MKS_42/2021	EPI_ISL_2692891	D	H	R	P	N	H	L	P	E	S	E	H	I	I	V	T	E	T	L	P	N	T	Y	T	D	P	Y	A	S	G	S	D	T	Q	W	L	F	ins	T	L	L	V	C	L	K	D	L	D
hCoV-19/Indonesia/SN-MKS_43/2021	EPI_ISL_2692892	D	H	R	P	N	H	L	P	E	L	E	H	V	I	V	T	E	T	L	P	N	T	Y	T	D	P	H	A	S	G	S	D	T	Q	W	L	F	ins	T	L	F	F	C	L	K	D	L	D
hCoV-19/Indonesia/SN-MKS_44/2021	EPI_ISL_2692896	D	H	R	P	N	H	L	P	E	L	E	H	V	I	V	T	E	T	L	P	N	T	Y	T	D	P	H	A	S	G	S	D	T	Q	W	L	F	ins	T	L	F	V	C	L	K	D	L	D
hCoV-19/Indonesia/SN-MKS_45/2021	EPI_ISL_2692897	D	H	R	P	N	H	L	P	E	L	E	H	V	I	V	T	E	T	L	P	N	T	Y	T	D	P	H	A	S	G	S	D	T	Q	W	L	F	ins	T	L	F	V	R	L	K	D	L	D
hCoV-19/Indonesia/SN-MKS_46/2021	EPI_ISL_2692899	D	H	R	P	N	H	L	P	E	L	E	H	V	I	V	T	E	T	L	P	N	T	Y	T	D	P	H	A	S	G	S	D	T	Q	W	L	F	ins	T	L	F	V	R	L	K	D	L	D
hCoV-19/Indonesia/SN-MKS_47/2021	EPI_ISL_2692900	D	H	R	P	S	H	L	P	E	L	E	H	V	I	V	T	E	T	L	P	N	T	Y	T	D	P	H	A	F	G	S	Y	T	Q	W	L	F	ins	T	L	F	V	C	L	K	D	L	Y
hCoV-19/Indonesia/SN-MKS_48/2021	EPI_ISL_2692902	D	H	R	P	N	H	L	P	E	L	E	H	V	I	V	T	E	T	L	P	N	T	Y	T	D	P	H	A	S	G	S	D	T	Q	W	L	F	ins	T	L	F	F	C	L	K	D	L	D
hCoV-19/Indonesia/SN-MKS_49/2021	EPI_ISL_2692903	D	H	R	P	N	H	L	P	E	L	E	Y	V	I	V	T	E	T	L	P	N	T	Y	T	D	L	H	A	S	G	S	D	T	Q	W	L	F	ins	T	L	F	V	C	L	K	D	L	D
hCoV-19/Indonesia/SN-MKS_50/2021	EPI_ISL_2692905	D	H	R	P	N	H	L	P	E	L	E	H	V	I	V	T	E	T	L	P	N	T	Y	T	D	P	H	A	S	G	S	D	T	Q	W	L	F	ins	T	L	F	V	C	L	K	D	L	D
Frequency		0.02	0.02	0.02	0.02	0.02	0.02	0.04	0.04	0.04	0.76	0.02	0.04	0.02	1	0.02	0.02	0.02	0.02	0.98	0.02	0.02	0.02	0.02	0.04	0.02	0.04	0.02	0.04	0.02	0.02	0.02	0.02	0.02	0.02	0.02	0.02	0.02	0.02	0.02	0.02	0.76	0.12	0.04	0.02	0.02	0.04	1	0.04
[truncated: 71 more columns]
